# Supplementary material
Source: PubMed Central journal article supplement (PMC1458033)

# S1

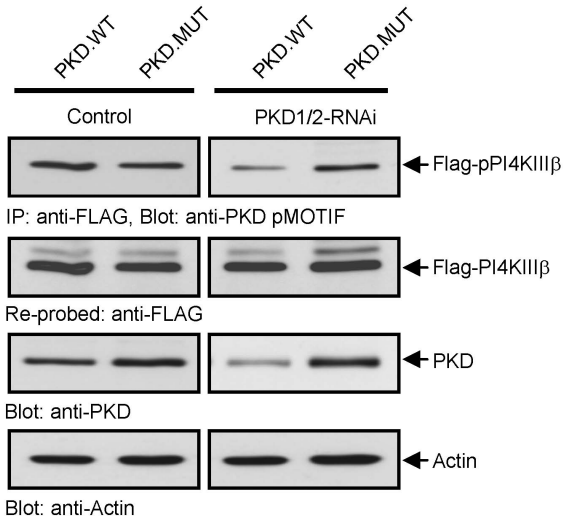

Supplement: NIHMS4991-supplement-sup1.pdf [file NIHMS4991-supplement-sup1.pdf]

# S2

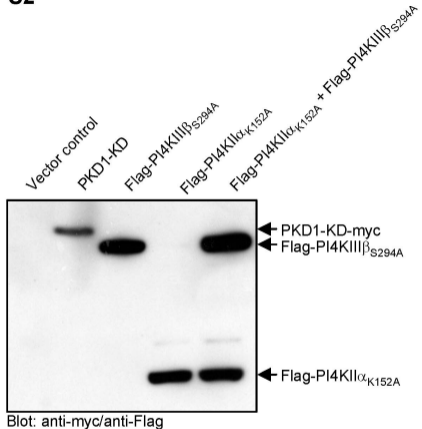

Relative amount of VSVG-GFP  
on plasmamembrane (FI)

|    |   |    |    |    |
|----|---|----|----|----|
| 24 | 6 | 28 | 20 | 20 |
|----|---|----|----|----|

Supplement: NIHMS4991-supplement-sup2.pdf [file NIHMS4991-supplement-sup2.pdf]
